# Supplementary material
Source: publisher figshare collection journal article supplement (https://sage.figshare.com/ndownloader/files/21001545)
Supplement: Supplementary file 1 [file 21001545]

**Table S2.** Concentrations of pollen types found in artificial traps in Trilha da Mata Lake, Carajás North Ridge, from September to December 2015.

|  | FO1 | FO2 | FO3 | FO4 | CV1 | CV2 | CV3 | CV4 | SW1 | SW2 | SW3 |
| --- | --- | --- | --- | --- | --- | --- | --- | --- | --- | --- | --- |
| *Aparisthmium/Alchornea* | 153.07 | 209.02 | 6.31 | 63.70 | 43.85 | 47.20 | 54.61 | 10.76 | 24.70 | 34.36 | 31.64 |
| *Bellucia dichotoma* | 11.20 | 0.00 | 0.00 | 0.00 | 0.00 | 6.74 | 0.00 | 0.00 | 4.20 | 0.00 | 0.00 |
| *Anthurium lindmanianum* | 0.00 | 0.00 | 0.00 | 0.00 | 0.00 | 0.00 | 12.85 | 0.00 | 0.00 | 0.00 | 0.00 |
| Fabaceae | 0.00 | 1.89 | 10.89 | 0.00 | 0.00 | 0.00 | 0.00 | 0.00 | 0.00 | 0.00 | 0.00 |
| *Schefflera* | 12.69 | 0.00 | 0.00 | 0.00 | 0.00 | 0.00 | 0.00 | 0.00 | 0.00 | 0.00 | 0.00 |
| *Aniba guianensis* | 0.00 | 11.35 | 0.00 | 1.13 | 0.00 | 0.00 | 0.00 | 0.00 | 0.00 | 0.00 | 0.00 |
| *Prestonia quinquangularis* | 1.49 | 5.67 | 1.15 | 3.38 | 0.00 | 0.00 | 0.00 | 0.00 | 0.00 | 0.00 | 0.00 |
| *Anacardium occidentale* | 2.99 | 2.84 | 0.00 | 0.00 | 0.00 | 0.00 | 0.00 | 0.00 | 0.00 | 0.00 | 0.00 |
| *Astronium* | 2.24 | 1.89 | 0.00 | 0.00 | 0.00 | 0.00 | 0.00 | 0.00 | 0.00 | 0.00 | 0.00 |
| *Myrcia* | 0.00 | 0.00 | 4.01 | 0.00 | 0.00 | 0.00 | 0.00 | 0.00 | 0.00 | 0.00 | 0.00 |
| *Ilex* | 0.75 | 0.00 | 0.00 | 0.00 | 0.00 | 0.00 | 0.00 | 0.00 | 2.10 | 1.16 | 0.00 |
| *Tapirira guianensis* | 0.00 | 0.00 | 0.00 | 0.00 | 1.29 | 0.00 | 0.00 | 0.49 | 2.10 | 0.00 | 0.00 |
| Bignoniaceaeundif. | 2.24 | 0.00 | 0.00 | 0.00 | 0.00 | 0.00 | 0.00 | 0.98 | 0.00 | 0.00 | 0.00 |
| *Inga* | 0.00 | 0.00 | 0.00 | 0.00 | 0.00 | 0.00 | 3.21 | 0.00 | 0.00 | 0.00 | 0.00 |
| *Myrcia splendens* | 0.00 | 0.00 | 0.00 | 2.82 | 0.00 | 0.00 | 0.00 | 0.00 | 0.00 | 0.00 | 0.00 |
| *Fridericia* | 0.00 | 1.89 | 0.00 | 0.00 | 0.00 | 0.00 | 0.00 | 0.00 | 0.00 | 0.00 | 0.00 |
| *Inga edulis* | 0.75 | 0.95 | 0.00 | 0.00 | 0.00 | 0.00 | 0.00 | 0.00 | 0.00 | 0.00 | 0.00 |
| *Stryphynodendrom* | 0.75 | 0.95 | 0.00 | 0.00 | 0.00 | 0.00 | 0.00 | 0.00 | 0.00 | 0.00 | 0.00 |
| *Myrcia sylvatica* | 0.00 | 0.95 | 0.57 | 0.00 | 0.00 | 0.00 | 0.00 | 0.00 | 0.00 | 0.00 | 0.00 |
| *Pleonotoma* | 0.75 | 0.00 | 0.00 | 0.00 | 0.00 | 0.00 | 0.00 | 0.49 | 0.00 | 0.00 | 0.00 |
| *Diospyros vestita* | 0.00 | 0.95 | 0.00 | 0.00 | 0.00 | 0.00 | 0.00 | 0.00 | 0.00 | 0.00 | 0.00 |
| Myrtaceae | 0.00 | 0.95 | 0.00 | 0.00 | 0.00 | 0.00 | 0.00 | 0.00 | 0.00 | 0.00 | 0.00 |
| *Abrus fruticulosus* | 0.75 | 0.00 | 0.00 | 0.00 | 0.00 | 0.00 | 0.00 | 0.00 | 0.00 | 0.00 | 0.00 |
| *Pleroma* | 0.00 | 3.78 | 0.57 | 15.78 | 2.58 | 0.00 | 725.94 | 3.91 | 0.00 | 0.00 | 0.00 |
| *Hyptis parkeri* | 0.00 | 0.00 | 0.00 | 0.00 | 1.29 | 4.49 | 0.00 | 0.00 | 49.92 | 16.60 | 69.80 |
| *Miconia* | 0.00 | 0.00 | 0.00 | 9.02 | 5.16 | 13.48 | 64.24 | 1.47 | 0.00 | 0.00 | 0.00 |
| Poaceae undif. | 2.99 | 3.78 | 0.00 | 0.00 | 3.87 | 6.74 | 70.67 | 2.94 | 0.00 | 0.00 | 0.00 |
| *Borreria* | 1.49 | 0.95 | 0.00 | 8.46 | 0.00 | 13.48 | 0.00 | 0.98 | 0.00 | 3.86 | 19.08 |
| *Perama carajensis* | 0.00 | 3.78 | 0.57 | 28.75 | 0.00 | 0.00 | 0.00 | 0.49 | 0.00 | 0.00 | 0.00 |
| *Byrsonima* undif. | 0.00 | 6.62 | 0.00 | 0.00 | 0.00 | 0.00 | 12.85 | 0.98 | 2.10 | 5.79 | 0.00 |
| *Ouratea castenifolia* | 9.71 | 4.73 | 0.00 | 0.00 | 0.00 | 0.00 | 0.00 | 0.00 | 1.58 | 6.95 | 4.52 |
| *Cuphea anagalloidea* | 0.00 | 0.00 | 0.00 | 0.00 | 0.00 | 0.00 | 16.06 | 0.00 | 0.00 | 0.00 | 0.00 |
| *Periandra coccinea* | 0.75 | 2.84 | 0.00 | 0.00 | 1.29 | 0.00 | 0.00 | 0.00 | 0.00 | 5.02 | 5.02 |
| *Phyllantus hyssopifolioloides* | 1.49 | 0.00 | 0.00 | 0.00 | 1.29 | 6.74 | 0.00 | 0.00 | 3.15 | 0.00 | 0.00 |
| *Lantana* | 0.00 | 0.00 | 0.57 | 10.15 | 0.00 | 0.00 | 0.00 | 0.00 | 0.00 | 0.00 | 0.00 |
| *Camptosema ellipticum* | 0.00 | 10.40 | 0.00 | 0.00 | 0.00 | 0.00 | 0.00 | 0.00 | 0.00 | 0.00 | 0.00 |
| *Borreria tenella* | 0.00 | 0.00 | 0.00 | 0.00 | 6.45 | 0.00 | 0.00 | 0.00 | 0.00 | 0.00 | 0.00 |
| *Psychotria* | 0.00 | 0.00 | 1.15 | 1.69 | 0.00 | 0.00 | 3.21 | 0.00 | 0.00 | 0.00 | 0.00 |
| *Lippia origanoides* | 3.73 | 0.00 | 0.00 | 0.00 | 0.00 | 2.25 | 0.00 | 0.00 | 0.00 | 0.00 | 0.00 |
| *Crotalaria* | 2.99 | 0.00 | 0.00 | 0.00 | 0.00 | 0.00 | 0.00 | 0.00 | 0.00 | 0.00 | 0.00 |
| *Palicourea* | 0.00 | 0.00 | 0.00 | 1.69 | 0.00 | 0.00 | 0.00 | 0.49 | 0.00 | 0.00 | 0.00 |
| *Lindernia crustacea* | 0.00 | 0.00 | 0.00 | 0.00 | 0.00 | 0.00 | 0.00 | 0.00 | 0.00 | 0.00 | 1.51 |
| *Callisthene minor* | 0.00 | 0.00 | 0.00 | 0.00 | 0.00 | 0.00 | 0.00 | 0.00 | 0.00 | 0.00 | 1.51 |
| *Mimosa* | 1.49 | 0.00 | 0.00 | 0.00 | 0.00 | 0.00 | 0.00 | 0.00 | 0.00 | 0.00 | 0.00 |
| *Cuphea* | 0.00 | 0.00 | 0.00 | 1.13 | 0.00 | 0.00 | 0.00 | 0.00 | 0.00 | 0.00 | 0.00 |
| *Mouriri vernicosa* | 0.00 | 0.00 | 0.00 | 0.00 | 0.00 | 0.00 | 0.00 | 0.00 | 0.00 | 0.00 | 1.00 |
| *Solanum crinitum* | 0.00 | 0.00 | 0.00 | 0.00 | 0.00 | 0.00 | 0.00 | 0.98 | 0.00 | 0.00 | 0.00 |
| *Mimosa acutistipula* var*. ferrea* | 0.00 | 0.95 | 0.00 | 0.00 | 0.00 | 0.00 | 0.00 | 0.00 | 0.00 | 0.00 | 0.00 |
| *Banisteriopsis malifolia* | 0.00 | 0.00 | 0.57 | 0.00 | 0.00 | 0.00 | 0.00 | 0.00 | 0.00 | 0.00 | 0.00 |
| *Vellozia glochidea* | 0.00 | 0.00 | 0.00 | 0.56 | 0.00 | 0.00 | 0.00 | 0.00 | 0.00 | 0.00 | 0.00 |
| *Aspilia attenuata* | 0.00 | 0.00 | 0.00 | 0.00 | 0.00 | 0.00 | 0.00 | 0.49 | 0.00 | 0.00 | 0.00 |
| *Dioclea guianensis* | 0.00 | 0.00 | 0.00 | 0.00 | 0.00 | 0.00 | 0.00 | 0.49 | 0.00 | 0.00 | 0.00 |
| *Mauritiella armata* | 0.00 | 0.00 | 0.00 | 0.00 | 0.00 | 0.00 | 0.00 | 0.00 | 2.10 | 42.08 | 7.03 |
| *Attalea maripa* | 0.75 | 12.30 | 0.00 | 0.00 | 0.00 | 0.00 | 0.00 | 0.00 | 2.10 | 0.00 | 2.51 |
| *Euterpe* | 0.00 | 0.00 | 0.00 | 0.00 | 3.87 | 2.25 | 0.00 | 0.00 | 0.00 | 0.00 | 0.00 |
| *Oenocarpus distichus* | 2.99 | 0.00 | 0.00 | 0.00 | 0.00 | 0.00 | 0.00 | 0.00 | 0.00 | 0.00 | 0.00 |
| *Elaeis* | 0.00 | 0.00 | 0.00 | 1.13 | 0.00 | 0.00 | 0.00 | 0.00 | 0.00 | 0.00 | 0.00 |
| Cyperacea undif. | 0.00 | 0.00 | 0.00 | 0.00 | 5.16 | 0.00 | 0.00 | 0.00 | 0.00 | 2.32 | 7.03 |
| Eriocaulaceae undif. | 8.96 | 0.00 | 0.00 | 0.00 | 0.00 | 0.00 | 0.00 | 0.00 | 0.00 | 0.00 | 0.00 |
| *Polygonum acuminatum* | 0.00 | 0.00 | 0.00 | 0.00 | 0.00 | 0.00 | 0.00 | 0.00 | 0.00 | 0.00 | 7.03 |
| *Polygala* | 2.24 | 0.00 | 0.00 | 0.56 | 0.00 | 0.00 | 0.00 | 1.47 | 0.00 | 0.00 | 0.00 |
| *Microgramma* | 0.00 | 20.81 | 1.15 | 0.56 | 0.00 | 0.00 | 6.42 | 0.49 | 1.58 | 2.32 | 10.04 |
| *Pteridium arachnoideum* | 16.43 | 12.30 | 0.57 | 1.13 | 0.86 | 8.99 | 0.00 | 0.00 | 0.00 | 0.00 | 0.00 |
